# Supplementary material
Source: HighWire-hosted journal article supplement (https://gut.bmj.com/content/gutjnl-2023-330584)

Trebicka, Hernaez, Shawcross, Gerbes

Recent advances in ACLF

**Title: Recent Advances in the treatment of decompensated cirrhosis and acute-on-chronic liver failure (ACLF)**

**SUPPLEMENTARY MATERIAL**

---

**Authors:** Jonel Trebicka<sup>1,2+</sup>, Ruben Hernaez<sup>3,4,5+</sup>, Debbie Shawcross<sup>6,7\*</sup>, Alexander Gerbes<sup>8\*</sup>

**Affiliations:**

<sup>1</sup> Department of Internal Medicine B, University of Münster, Münster, Germany

<sup>2</sup> European Foundation for the Study of Chronic Liver Failure, EFCLIF, Barcelona, Spain

<sup>3</sup> Section of Gastroenterology, Michael E. DeBakey Veterans Affairs Medical Center, TX Center, Houston, TX, USA

<sup>4</sup> VA HSR&D Center for Innovations in Quality, Effectiveness and Safety, Michael E. DeBakey VA Medical Center, Houston, TX, USA

<sup>5</sup> Section of Gastroenterology and Hepatology, Department of Medicine, Baylor College of Medicine, Houston, TX, USA

<sup>6</sup> Institute of Liver Studies, Dept of Inflammation Biology, School of Immunology and Microbial Sciences, Faculty of Life Sciences and Medicine, King's College London, UK

<sup>8</sup> Department of Medicine II, University Hospital, LMU Munich, Munich, Germany

+ and \* Authors share respectively first and last authorship.

Trebicka, Hernaez, Shawcross, Gerbes

Recent advances in ACLF

**SUPPLEMENTARY TABLE 1: Standard therapies**

| Complication of cirrhosis              |                           | Non-acute decompensation                                          | Acute decompensation                                                           | ACLF                                                                                       |
|----------------------------------------|---------------------------|-------------------------------------------------------------------|--------------------------------------------------------------------------------|--------------------------------------------------------------------------------------------|
| <b>Hepatic encephalopathy</b>          |                           | lactulose<br>rifaximin<br>BCAA,<br>nutritional intervention       | lactulose<br>i.v. LOLA<br>rifaximin+<br>BCAA+<br>nutritional intervention+     | lactulose<br>i.v. LOLA<br>ALS (e.g MARS)                                                   |
| <b>GI-bleeding</b>                     |                           | NSBB (prophylaxis)<br>endoscopy (EVL)<br>vasoconstrictors<br>TIPS | endoscopy (EVL)<br>vasoconstrictors<br>TIPS                                    | endoscopy (EVL)<br>vasoconstrictors<br>TIPS                                                |
| <b>Tense Ascites</b>                   | <b>Responsive ascites</b> | nutritional intervention<br>diuretics,                            | nutritional intervention*<br>diuretics*,                                       | nutritional intervention*<br>albumin                                                       |
|                                        | <b>Recidivant ascites</b> | diuretics<br>TIPS<br>albumin for LVP<br>long-term albumin         | TIPS<br>albumin for LVP<br>long-term albumin <sup>+</sup>                      | TIPS<br>albumin<br>long-term albumin <sup>+</sup>                                          |
|                                        | <b>Refractory ascites</b> | TIPS<br>albumin for LVP<br>long-term albumin                      | TIPS<br>albumin for LVP<br>long-term albumin <sup>+</sup>                      | TIPS<br>albumin<br>RRT                                                                     |
| <b>SBP</b>                             |                           | cephalosporins<br>albumin (d1/d3)<br>norfloxacin <sup>+</sup>     | cephalosporins<br>albumin (d1/d3)<br>norfloxacin<br>(prophylaxis) <sup>+</sup> | broad-band antibiotics<br>albumin (d1 and d3)<br>norfloxacin<br>(prophylaxis) <sup>+</sup> |
| <b>Non-SBP infection</b>               |                           | antibiotics according to<br>site of infection                     | antibiotics according to<br>site of infection                                  | antibiotics according to<br>site of infection<br>albumin                                   |
| <b>Alcohol-related hepatitis</b>       |                           | steroids <sup>#</sup>                                             | steroids <sup>#</sup>                                                          | steroids <sup>#</sup>                                                                      |
| <b>Reactivation of viral hepatitis</b> |                           | tenofovir                                                         | tenofovir                                                                      | tenofovir<br>(steroids)                                                                    |
| <b>AKI</b>                             |                           | stop nephrotoxic drugs<br>albumin for 48h                         | stop nephrotoxic drugs<br>albumin for 48h                                      | stop nephrotoxic drugs<br>albumin for 48h                                                  |
| <b>HRS</b>                             |                           | albumin<br>terlipressin                                           | albumin<br>terlipressin                                                        | albumin<br>terlipressin (except for<br>ACLF III)                                           |

\* effect is expected in long-term; <sup>+</sup> at discharge; <sup>#</sup> according to Maddrey DF (Biggins et al. Hepatology. 2021 Aug;74(2):1014-1048; de Franchis et al. J Hepatol. 2022 Apr;76(4):959-974; EASL. J Hepatol. 2018 Aug;69(2):406-460; EASL. J Hepatol. 2023 Aug;79(2):461-491)

**Abbreviations:** AKI: acute kidney injury, HRS: hepatorenal syndrome, TIPS: transjugular portosystemic shunt; EVL: endoscopic variceal ligation; LVP: large volume paracentesis; d: day; ACLF: acute-on-chronic liver failure; SBP: spontaneous bacterial peritonitis; GI: gastrointestinal; BCAA: Branched-chain amino acids; LOLA: l-Ornithine l-Aspartate; ALS: artificial liver support; MARS: Molecular adsorbent recirculating system; NSBB: non-selective beta blockers

Trebicka, Hernaez, Shawcross, Gerbes

Recent advances in ACLF

**SUPPLEMENTARY TABLE 2. Example biomarker**

|                                          | Description                                                                                                                                                                                                                                                                                                                                                                                                                                                                                                          | Examples                                                                                                                                                                                                                                                                                                                                                                                                                  |                                                                                                                                                                                                                                                              |
|------------------------------------------|----------------------------------------------------------------------------------------------------------------------------------------------------------------------------------------------------------------------------------------------------------------------------------------------------------------------------------------------------------------------------------------------------------------------------------------------------------------------------------------------------------------------|---------------------------------------------------------------------------------------------------------------------------------------------------------------------------------------------------------------------------------------------------------------------------------------------------------------------------------------------------------------------------------------------------------------------------|--------------------------------------------------------------------------------------------------------------------------------------------------------------------------------------------------------------------------------------------------------------|
| <b>Biomarker name</b>                    | Specific analyte (e.g., fibronogen), anatomic feature (e.g., resistive index), physiological characteristic (e.g., hepatic pressure gradient)                                                                                                                                                                                                                                                                                                                                                                        | Neutrophil gelatinase-associated lipocalin                                                                                                                                                                                                                                                                                                                                                                                | Alanine aminotransferase                                                                                                                                                                                                                                     |
| <b>Acronym</b>                           | ---                                                                                                                                                                                                                                                                                                                                                                                                                                                                                                                  | NGAL                                                                                                                                                                                                                                                                                                                                                                                                                      | ALT                                                                                                                                                                                                                                                          |
| <b>Unique identifier (if applicable)</b> | Formal chemical name or, if listed in a library or other resource, the correct name or unique identifier, referencing the resource and version. E.g. UniProt ( <a href="http://uniprot.org/">http://uniprot.org/</a> ) HUGO Gene Nomenclature Committee ( <a href="http://genenames.org">http://genenames.org</a> ), Protein Data Bank ( <a href="http://rcsb.org/pdb/home/home.do">http://rcsb.org/pdb/home/home.do</a> ), or Enzyme Commission ( <a href="http://enzyme.expasy.org">http://enzyme.expasy.org</a> ) | P80188                                                                                                                                                                                                                                                                                                                                                                                                                    | EC 2.6.1.2                                                                                                                                                                                                                                                   |
| <b>Source</b>                            | urine, biopsy, imaging, functional studies                                                                                                                                                                                                                                                                                                                                                                                                                                                                           | Urinary                                                                                                                                                                                                                                                                                                                                                                                                                   | Serum                                                                                                                                                                                                                                                        |
| <b>Type</b>                              | molecular, histologic, radiographic, digital, or physiologic                                                                                                                                                                                                                                                                                                                                                                                                                                                         | Molecular                                                                                                                                                                                                                                                                                                                                                                                                                 | Molecular                                                                                                                                                                                                                                                    |
| <b>Biological plausibility</b>           | Brief summary of the biological, physiological, or pathological pathway for the association of the biomarker with ACLF and its intended use. This information specifies how multiple biomarkers may interplay as part of a common use (e.g., shared biochemical pathways leading to a common biologic or clinical phenotype)                                                                                                                                                                                         | Neutrophil gelatinase-associated lipocalin (NGAL) is upregulated in experimental models of liver injury and cultured hepatocytes as a result of injury by toxins or proinflammatory cytokines, particularly interleukin-6. Ariza et al. found that NGAL was a marker of ACLF and prognosis correlating with liver failure, systemic inflammation and overexpression of LCN2 gene in ACLF. J Hepatol. 2016 Jul;65(1):57-65 | ALT catalyses the transfer of an amino group from L-alanine to $\alpha$ -ketoglutarate, the products of this reversible transamination reaction being pyruvate and L-glutamate. In liver damage, it is released from hepatocyte injury into the circulation. |
| <b>Measurement method</b>                | Description of method used to measure the biomarker to enable comparison across studies, e.g., ELISA                                                                                                                                                                                                                                                                                                                                                                                                                 | ELISA                                                                                                                                                                                                                                                                                                                                                                                                                     | spectrophotometric detection                                                                                                                                                                                                                                 |
| <b>Units of measurement</b>              | ---                                                                                                                                                                                                                                                                                                                                                                                                                                                                                                                  | Mcg/gm creatinine                                                                                                                                                                                                                                                                                                                                                                                                         | International Units/L                                                                                                                                                                                                                                        |
| <b>Point of care access/use?</b>         |                                                                                                                                                                                                                                                                                                                                                                                                                                                                                                                      | No                                                                                                                                                                                                                                                                                                                                                                                                                        | Yes                                                                                                                                                                                                                                                          |

Trebicka, Hernaez, Shawcross, Gerbes

Recent advances in ACLF

**Supplementary Figure 1.** . Drug discovery and development processes with a potential to benefit from biomarkers in different clinical phases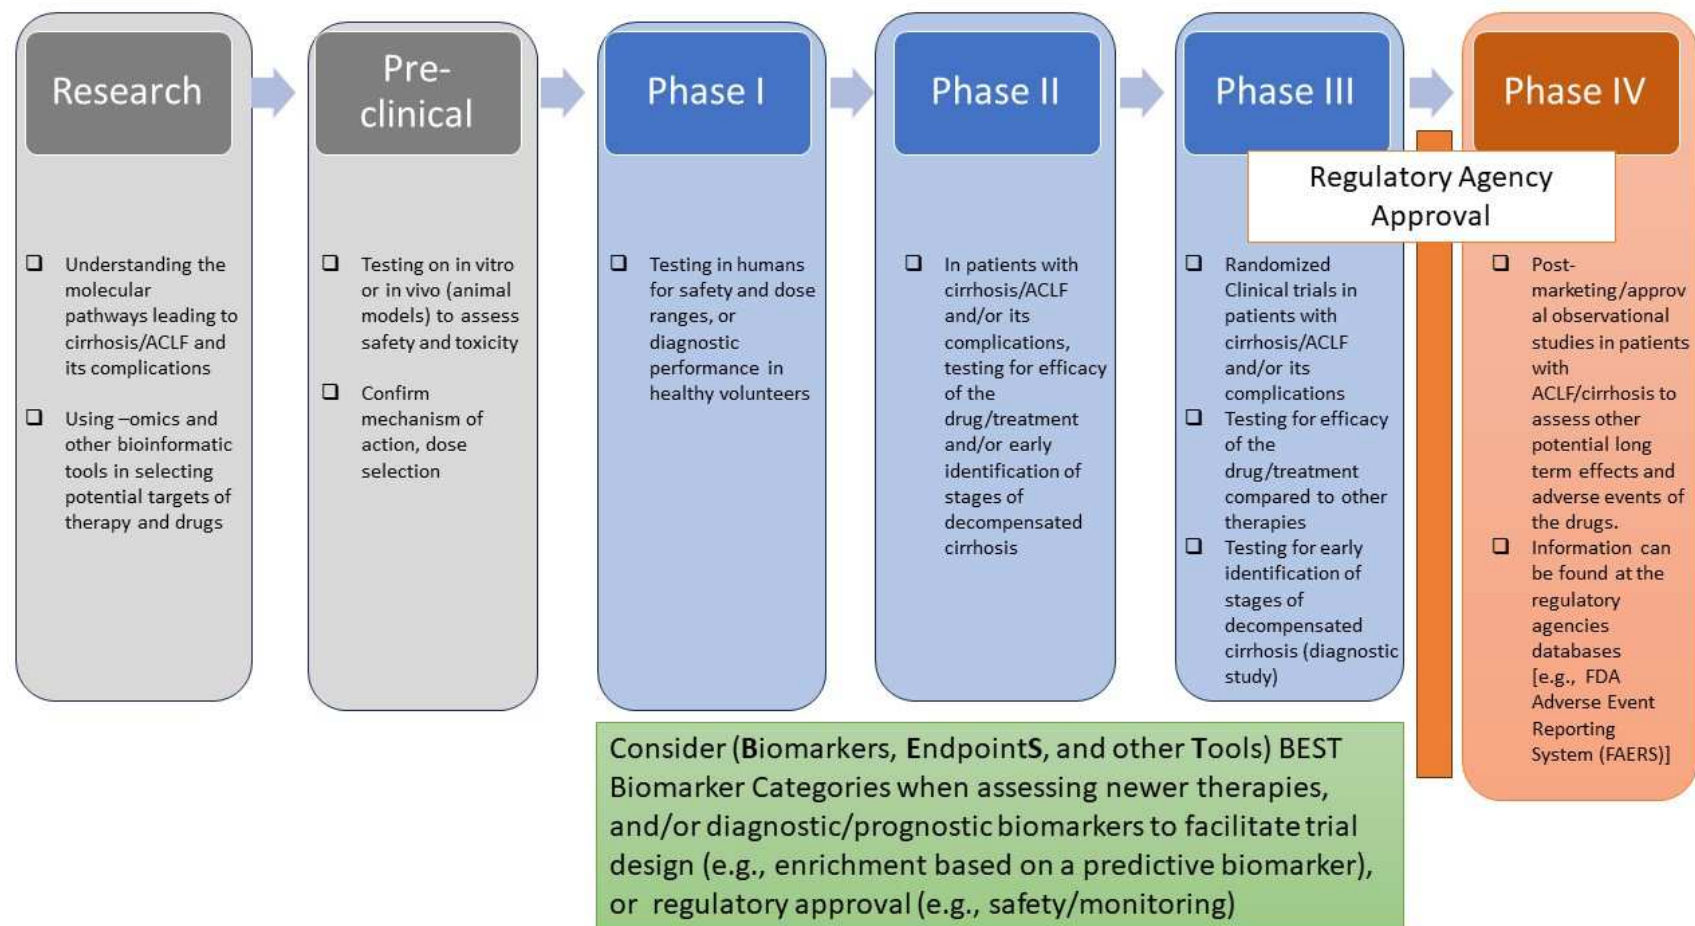

Trebicka, Hernaez, Shawcross, Gerbes

Recent advances in ACLF

**Supplementary Figure 2.** The suggested biomarker validation approach. Draft guidance. Food and Drug Administration in 2018. Available at:<https://www.fda.gov/media/119271/download> .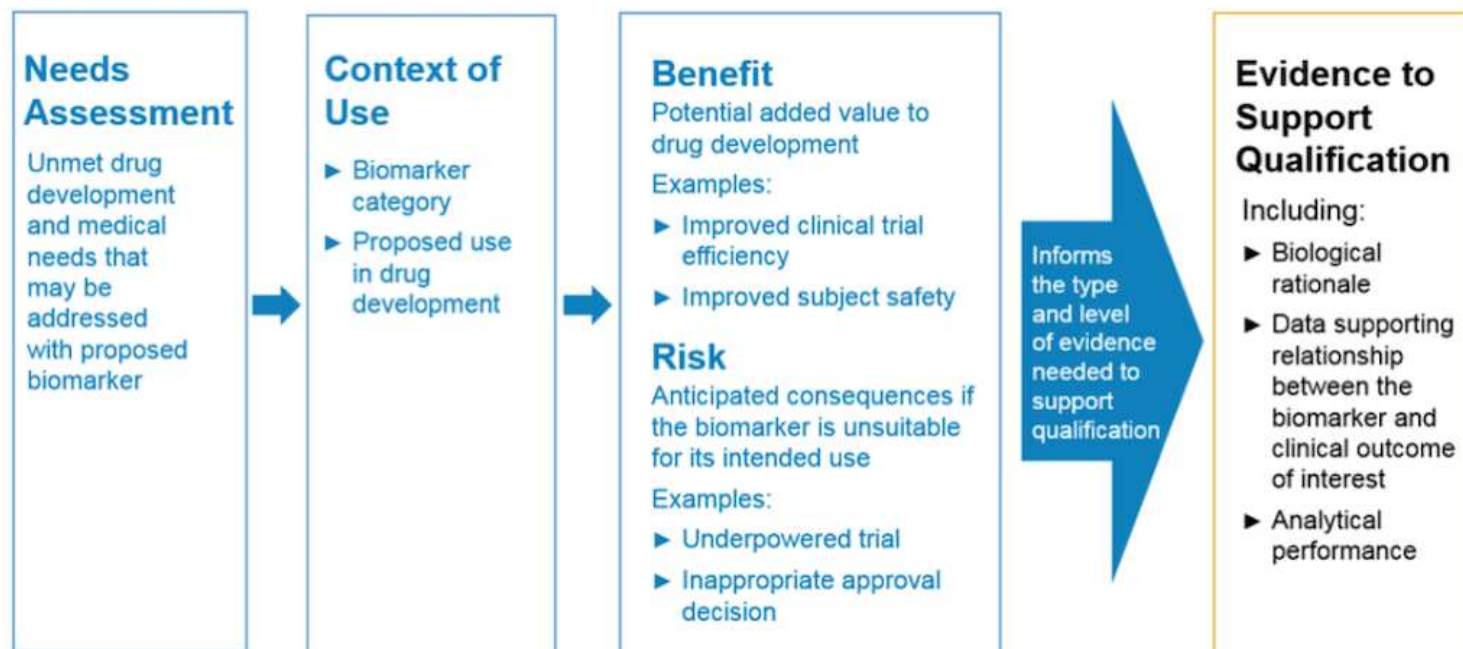

Trebicka, Hernaez, Shawcross, Gerbes

Recent advances in ACLF

**Supplementary Figure 3.** The evidentiary framework was drafted by the Food and Drug Administration when determining the type and level of evidence sufficient to support the qualification of a biomarker. Available at: <https://www.fda.gov/media/119271/download>

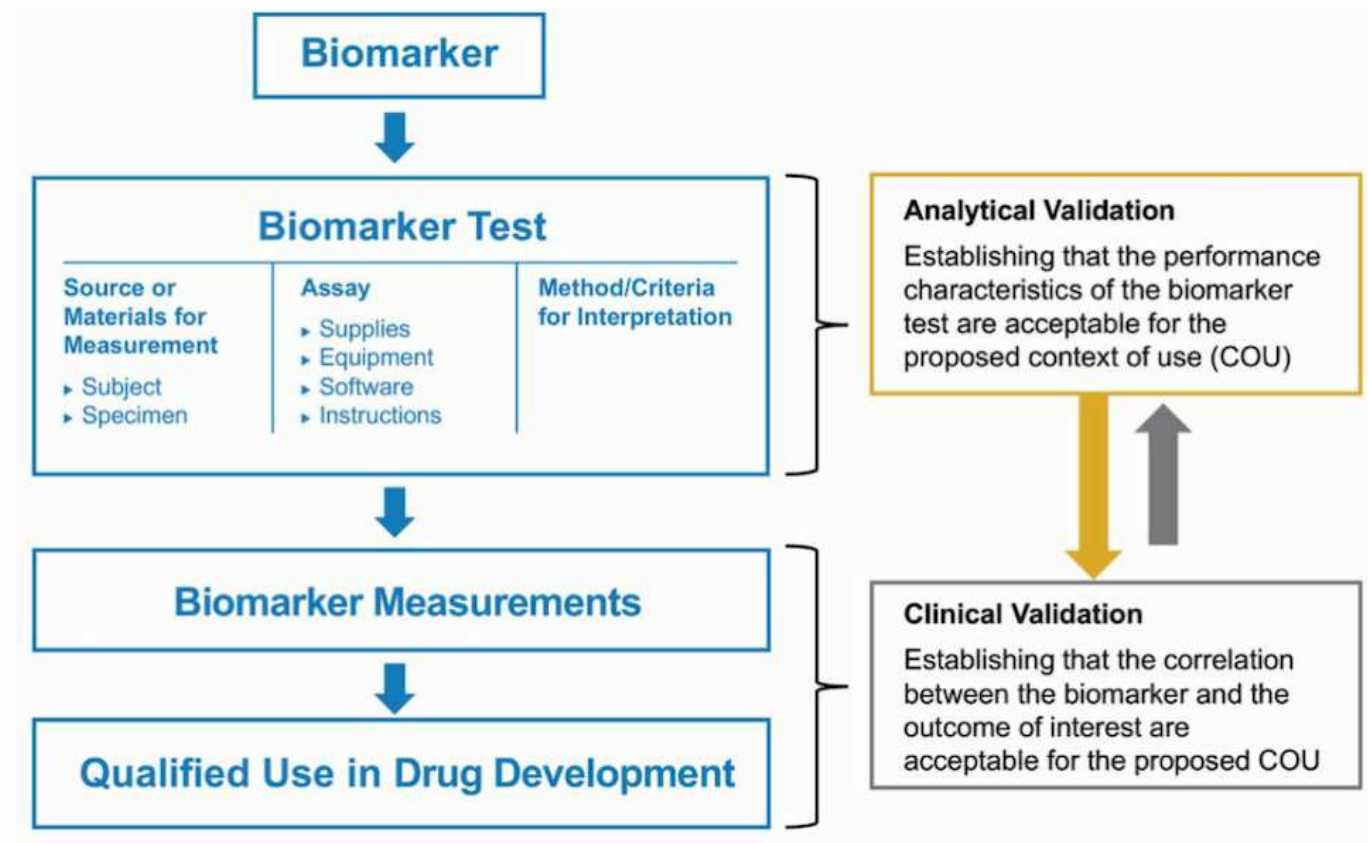

Supplement: inline-supplementary-material-1 [file inline-supplementary-material-1.pdf]
